# Supplementary material for: Response of soil respiration and soil microbial biomass carbon and nitrogen to grazing management in the Loess Plateau, China
Source: Copernicus journal article supplement (doi:10.5194/bg-2018-531), 2019-01-14
Supplement: Supplementary file [file bg-2018-531-AC3-supplement.pdf]

1 **Response of soil respiration and soil microbial biomass**  
2 **carbon and nitrogen to grazing management in semi-arid**  
3 **grassland**

4  
5 Zhen Wang<sup>1,2</sup>, Xiuli Wan<sup>1</sup>, Mei Tian<sup>1</sup>, Xiaoyan Wang<sup>1</sup>, Junbo Chen<sup>1</sup>, Xianjiang Chen<sup>1</sup>,  
6 Shenghua Chang<sup>1</sup>, Fujiang Hou<sup>1,2</sup>

7 <sup>1</sup>State Key Laboratory of Grassland Agro-Ecosystems; College of Pastoral Agriculture Science and  
8 Technology, Lanzhou University, Lanzhou 730020, Gansu, China

9 <sup>2</sup>Key Laboratory of Grassland Agro-Ecosystem, Ministry of Agriculture; Key Laboratory of Grassland  
10 Livestock Industry Innovation, Ministry of Agriculture; College of Pastoral Agriculture Science and  
11 Technology, Lanzhou University, Lanzhou 730020, Gansu, China

12 *Correspondence to:* Fujiang Hou. (e-mail: cyhoufj@lzu.edu.cn)

13  
14 **Abstract**

15 Grazing management affects grassland carbon dynamics and soil microbial biomass, yet how  
16 grazing management, including grazing intensity (GI) and grazing regime (GP), affects soil  
17 respiration (Rs) and soil microbial biomass carbon (SMBC) and nitrogen (SMBN) is not fully  
18 understood. To determine how GI (0, 2.7, 5.3, and 8.7 sheep ha<sup>-1</sup>) and GP (warm-season grazing,  
19 WG; cold-season grazing, CG) affect Rs, SMBC, and SMBN, an experiment was conducted in a  
20 semi-arid grassland that had been rotationally grazed for the previous 9 years. Results suggest that  
21 diurnal Rs in WG significantly decreased as stocking rate increased; however, in CG, diurnal Rs  
22 was significantly higher at the GIs of 2.7 and 5.3 sheep ha<sup>-1</sup> than at 0 and 8.7 sheep ha<sup>-1</sup>. Although  
23 grazing (at the GIs of 2.7, 5.3, and 8.7 sheep ha<sup>-1</sup>) led to increased Rs in 2010 and decreased Rs in  
24 2011, when compared with Rs in the non-grazing period (0 sheep ha<sup>-1</sup>), the negative indirect effect  
25 of GI on Rs offset its positive indirect effect on Rs over the whole experimental period. GP  
26 affected Rs both directly and indirectly through the positive effect it had on soil moisture, soil  
27 temperature, and aboveground biomass. Compared with WG, CG significantly stimulated an  
28 increase by 22% in annual Rs. A significant difference in the soil temperature sensitivity (Q<sub>10</sub>)

29 values of  $R_s$  was observed at the four stocking rates for both WG and CG, although the  $Q_{10}$  of WG  
30 was significantly higher. Interactions between GI and GP had a significant effect on SMBC and  
31 SMBN, but GI alone did not affect SMBN. Regarding GP, compared with WG, CG caused a  
32 significant decrease of 11% in the mean concentration of SMBN. The monthly precipitation was  
33 significantly positively correlated with  $R_s$ , soil temperature, soil moisture, and SMBN, but was  
34 significantly negatively correlated with SMBC. The field experimental results indicated that the  
35 effects of grazing management on  $R_s$  processes in the grazing system mainly depend on GP, and  
36 the effects of grazing management on SMBC and SMBN mainly depend on the interactions  
37 between GI and GP. The results suggest that (1) In a long-term grazing grassland ecosystem, more  
38 attention should be paid the role of GP while determining the response of  $R_s$  to grazing  
39 management, and GP should be considered as an important factor in future evaluation models for  
40 studying the response of soil carbon dynamics to climate change; (2) the coupling of GI and GP  
41 should be taken into account in future studies on nutrient turnover in the soils of semi-arid  
42 grassland ecosystems.

43

#### 44 **1. Introduction**

45 Grasslands cover about 41% of Earth's terrestrial surface, and support domestic livestock grazing in  
46 extensive agricultural grazing systems (Morgan et al. 2007). Owing to their large area and excellent  
47 ability to sequester and store carbon, grasslands can provide important ecosystem services (Zhao et al.  
48 2017). Grasslands in China constitute 6–8% of global grasslands and significantly contribute to global  
49 carbon storage, thereby significantly affecting global carbon cycles (Ni 2002). Soil respiration ( $R_s$ ) is  
50 the second largest carbon flux between the atmosphere and terrestrial biomes (Cox et al. 2000; Wan et  
51 al. 2007) and includes microbial and root respiration (Davidson and Janssens 2006; Jia et al. 2007; Ru  
52 et al. 2017). Numerous previous studies have indicated that biological and environmental variables,  
53 such as precipitation (Xu et al. 2016; Hawkes et al. 2017), soil temperature (Thomey et al. 2011), soil  
54 water content (Hawkes et al. 2017), climate, and microbial community composition (Monson et al.  
55 2006), are major factors determining soil and ecosystem respiration in grasslands. In addition,  
56 anthropogenic factors, such as grazing, are strongly modifying biogeochemical cycles (Wang and Fang  
57 2009). For example, the structure or species composition of plant communities, soil microclimates, soil  
58 chemical and physical properties, and global climate, are all affected by human activities, which in turn

59 might affect Rs rates (Raich and Schlesinger 1992).

60 Although a growing number of studies have shown that the health of grassland ecosystems strongly  
61 depends on grassland management strategies, such as grazing and grazing exclusion (Chen et al. 2015;  
62 Deng et al. 2017), the influence of grazing management on Rs is not well understood. This limits our  
63 understanding of how Rs responds to grazing management and our ability to predict carbon dynamic  
64 responses under continued climate change. Grasslands are widely distributed on the Loess Plateau,  
65 accounting for approximately 40% of the total area (Wang et al. 2017), and are subject to continuous  
66 and widespread stress. Most of the grasslands on the Loess Plateau have degenerated owing to their  
67 over-grazing and poor management (Fu et al. 2000). Efficient grassland management strategies have  
68 been considered to be an important way to promote soil carbon storage and to recover degraded  
69 grasslands (Conant et al. 2001; Ingram et al. 2008; Wang et al. 2011). Sustainable grazing intensity (GI)  
70 and a seasonal grazing regime (GP) with periodic resting are widely used grassland management  
71 practices (Cui et al. 2014; Chen et al. 2016; Wang et al. 2017, Wu et al. 2017). Grazing-induced soil  
72 respiration has been well studied; however, how the effects of different GIs on soil respiration vary  
73 through time remains unclear. For example, previous studies have reported that grazing had a positive  
74 effect on Rs (Cao et al. 2004), had no effect on Rs (Jia et al. 2007; Wang et al. 2007; Cui et al. 2014),  
75 and had a negative effect on Rs (Chen et al. 2016). Furthermore, in different types of grassland, Chen et  
76 al. (2015) found that warm-season grazing (WG) decreased Rs, while Wang et al. (2017) reported that  
77 cold-season grazing (CG) significantly increased Rs. These inconsistent results could be attributed to  
78 the complex processes induced by GP. Therefore, limited information is available on the effects of GP,  
79 especially seasonal grazing, on Rs under different levels of GI. Quantifying the effects of GI and  
80 grazing season on Rs is critical to accurately estimate the carbon balance of grassland ecosystems and  
81 to better understand how global changes affect grazing management practices on the Loess Plateau.

82 Soil microorganisms are an important component of terrestrial ecosystems and play important roles in  
83 global nutrient cycling and organic matter decomposition (Wang et al. 2013). In this context, soil  
84 microbial biomass adjusts the balance between the release of carbon during Rs and its sequestration as  
85 soil microbial biomass carbon (SMBC) (Lange et al. 2015; Thakur et al. 2015). Thus, microbial  
86 biomass is used to assess soil quality. Soil microbial biomass nitrogen (SMBN) is highly labile, and the  
87 nitrogen pool in soils is a key regulator of C sequestration (Deng et al. 2017). Elevated soil CO<sub>2</sub>  
88 reduces available soil nitrogen, imposing nitrogen constraints on microbes and reducing microbial

89 respiration per unit biomass (Hu et al. 2001). Reports on the effects of grazing on SMBC and SMBN in  
90 natural grasslands have been inconsistent (Fu et al. 2012; Liu et al. 2012; Lange et al. 2015). Ambient  
91 environmental factors (precipitation, air temperature, soil moisture, and soil temperature), livestock  
92 type, and grazing management have been shown to affect belowground carbon and nitrogen dynamics  
93 (Zhou et al. 2017). Gallardo and Schlesinger (1992) found a succession in the control of microbial  
94 biomass from nitrogen to carbon when the ratio of carbon to nitrogen decreased. Fu et al. (2012) found  
95 that grazing significantly decreased SMBC and SMBN in an alpine meadow, while Wang et al. (2006)  
96 and de Faccio Carvalho et al. (2010) found that cattle grazing increased SMBC. Limited evaluations of  
97 soil microbial biomass in semi-arid grasslands and contradictory results regarding the effects of grazing  
98 underscore the need for additional research, especially regarding GI (Mahecha et al. 2010) and GP.  
99 Therefore, studies on the links between soil microbial biomass and environmental parameters provide a  
100 better understanding of the factors that control nutrient cycling in grassland ecosystems.

101 Given this context, a 2-year study based on a long-term rotational grazing experiment was conducted.  
102 The rotational grazing experiment began in 2001, and the Rs and soil microbial C and N were  
103 measured from 2010–2011. We hypothesized that the effects of GI on Rs could be offset by  
104 GP-induced direct and indirect biotic (above/below-ground biomass, SMBC, SMBN) and abiotic  
105 variables (soil temperature, soil moisture) in long-term grazing grassland ecosystems. In the present  
106 study, we investigated the following: 1) the effect of long-term rotational grazing on Rs under different  
107 GIs and two GPs (warm-season grazing, WG; cold-season grazing, CG); 2) the effect of long-term  
108 rotational grazing on SMBC and SMBN under different GIs and GPs; 3) the mechanisms driving the  
109 responses of Rs, and soil microbial C and N to the different grazing management practices (GI and  
110 GP).

111

## 112 2. Materials and methods

113 The study site was conducted in the core of the Loess Plateau at Huanxian Grassland Ecosystem Trial  
114 Station in eastern Gansu Province, northwest China (37.14°N, 106.84°E; 1650 m a.s.l.). The average  
115 annual air temperature of the study site was 7.1 °C, with maximum temperature occurring in July and  
116 minimum in January; the annual mean air temperatures were 8.7 °C and 7.9 °C in 2010 and 2011,  
117 respectively (Fig. 2); the average annual rainfall was 360 mm, with >70% of rainfall occurring from  
118 mid-June to September (Fig. 2), and the mean monthly precipitations were 23.2 mm and 27.8 mm in

119 2010 and 2011, respectively (Fig. 2), and the precipitation in September 2011 was 104.4 mm, which far  
120 exceeded the precipitation in other months (mean monthly precipitation: 27.8 mm). The average annual  
121 potential evaporation was 1993 mm. The spring and autumn seasons at the study site were typically  
122 short; summer was hot and humid and occurred when most rainfall occurred; winter was long, cold,  
123 and dry; soil was classified as sandy, free-draining loess, and the rangeland was a typical temperate  
124 steppe (Hou et al. 2002). Dominant grassland species were *Stipa bungeana*, *Lespedeza davurica*,  
125 *Pennisetum flaccidum*, *Artemisia capillaris*, and *Setaria viridis* (Hou et al. 2002).

126

## 127 **2.2 Experimental design**

### 128 2.2 Experimental design

129 Two sites with similar topography, vegetation, and cover were selected for separate warm-season  
130 (summer) and cold-season (winter) grazing trial plots. Each site was divided into 12 enclosed 0.5-ha  
131 replicate plots (i.e., three replicates for each of the four stocking rates); and stocked with 0, 4, 8, and 13  
132 wether sheep of similar liveweight, representing stocking rates of 0, 2.7, 5.3, and 8.7 sheep ha<sup>-1</sup>,  
133 respectively (Fig. 1). The classification of stocking rates was based on local habitat productivity, and  
134 the method of GI calculation was based on the number of wether sheep allocated to a specific GI  
135 treatment divided by the combined area of 1.5 ha (i.e., 2.7 sheep ha<sup>-1</sup> = 4 sheep/1.5 ha) for the three  
136 replicates in each grazing season (Chen et al. 2010). The specific methods used for rotational grazing  
137 were: In each grazing season, the wethers were allocated to three replicates for each of the four  
138 stocking rates, and rotationally grazed between each replicate plot allocated to that stocking rate. The  
139 WG plots were rotationally grazed from June to September (90 days), with a rotation cycle length of 30  
140 days (10 days grazing and 20 days rest) and three rotations. The CG plots were grazed from  
141 mid-November to late December (48 days), with a rotation cycle length of 24 days (eight days grazing  
142 and 16 days rest) and two rotations. The rotational grazing system field experiment began in 2001. The  
143 Rs measurements were conducted in both WG and CG plots in 2010, after the trial site had been  
144 rotationally grazed for the previous 9 years.

145

### 146 **2.3 Rs measurement**

147 For the field measurement of Rs, soil CO<sub>2</sub> efflux chambers (six PVC collars permanently placed in  
148 each plot) were attached to each of the two gas analyzers (LI-COR 8150, Lincoln, NE, USA), which

149 were rotated in a 2-h cycle around all plots in each GP group (WG and CG). The diurnal  $R_s$  flux in  
150 each plot was measured at 2h intervals between 6:00 am and 10:00 pm, on six fine days in mid-May  
151 (early growth stage of herbage), September (peak aboveground biomass), and December (dormancy)  
152 only in 2010 and 2011. Sampling sites were randomly selected at 30–40-m intervals along three 50-m  
153 long transects per plot, with two PVC collars (11 cm diameter  $\times$  5 cm height) per transect (i.e., six  
154 collars per plot). In preparation for  $R_s$  measurement, all aboveground vegetation in each PVC collar  
155 was clipped to ensure only  $R_s$  was measured. The measurement by gas analyzer took approximately 1.5  
156 min to complete per chamber, connected to six soil efflux collars per plot for a total of 9 min.

157

#### 158 **2.4 Soil temperature and soil moisture**

159 Soil temperature at 10 cm depth was measured in real time using a thermocouple probe attached to  
160 every soil efflux collar during each  $R_s$  measurement. The soil moisture samples for gravimetric  
161 analysis were taken from the top 10 cm, close to every soil efflux collar, once daily in mid-morning  
162 (9:00–11:00 h) on the  $R_s$  sampling days, and were then oven dried at 105 °C for 48 h.

163

#### 164 **2.5 Soil sampling and biomass measurements**

165 Soil samples were collected from random locations adjacent to each  $R_s$  measurement site at 5 cm and  
166 10 cm depths during the  $R_s$  determination period. After soil samples were coarsely sieved (4.75 mm) to  
167 remove rocks and large roots, they were sealed in plastic bags and immediately transported to the  
168 laboratory for analysis. The **aboveground biomass** was estimated by cutting all vegetation in 1 m  $\times$  1 m  
169 quadrats (six per plot) after the plots were grazed during the second rotation in early September of 2010  
170 and 2011, when the aboveground biomass peaked. The samples were oven dried at 65 °C to a constant  
171 weight. Once the **aboveground biomass** and litter were harvested, soil cores (10 cm depth, 10.0 cm  
172 diameter) to a depth of 1 m were collected using a soil auger to calculate the belowground biomass in  
173 each quadrat, using the method described by Chen et al. (2015).

174

#### 175 **2.6 Soil microbial carbon and nitrogen**

176 SMBC and SMBN were determined using a chloroform fumigation-extraction procedure and were  
177 calculated using the difference in dissolved organic carbon and dissolved organic nitrogen between the  
178 fumigated and non-fumigated soil subsamples (Brookes et al. 1985; Vance et al. 1987). Briefly, 10 g

179 soil samples were fumigated with chloroform for 24 h in a vacuum desiccator, and other 10 g samples  
180 served as non-fumigated controls. Carbon and nitrogen were extracted with 50 ml of 0.5 M K<sub>2</sub>SO<sub>4</sub> for  
181 30 min from fumigated and non-fumigated samples, and the extracts were filtered and frozen at -20 °C  
182 before analysis with a Total Dissolved Organic Carbon and Nitrogen Analyzer-multi NC 2100S  
183 (Analytik Jena AG, Jena, Germany).

184

## 185 2.7 Statistical analysis

186 One-way analyses of variances (ANOVAs) followed by least significant difference (LSD) tests were  
187 performed to examine the effects of GI (0, 2.7, 5.3, and 8.7 sheep ha<sup>-1</sup>) and GP (WG and CG) on  
188 diurnal fluctuations of Rs. One-way ANOVAs were also used to examine the effect of GI and GP on  
189 aboveground biomass, belowground biomass, soil temperature, and soil moisture. The  
190 repeated-measures ANOVAs were performed to examine the effect of GI and GP on seasonal variations  
191 in Rs ( $\mu\text{mol CO}_2 \text{ m}^{-2} \text{ s}^{-1}$ ) and soil microbial carbon ( $\text{g kg}^{-1}$ ) and nitrogen ( $\text{g kg}^{-1}$ ) in the May,  
192 September, and December of 2010 and 2011 (sampling times). A Pearson correlation analysis was used  
193 to test the associations between monthly precipitation and Rs, SMBC, SMBN, soil moisture, soil  
194 temperature, and the responses of those variables to monthly precipitation (two-tailed test). Significant  
195 differences for all statistical tests were evaluated at the level of  $P \leq 0.05$ . To investigate the temperature  
196 sensitivity of Rs, regression analyses were conducted using  $R_s = ae^{bT}$ , where Rs is soil respiration, T is  
197 soil temperature, coefficient a is the intercept of soil respiration at 0 °C, and coefficient b represents the  
198 temperature sensitivity of Rs that was used to calculate the respiration quotient  $Q_{10} = e^{10b}$  (Luo et al.  
199 2001). For means, a two-sample t-test was used to determine the significance of difference between the  
200  $Q_{10}$  values under different GPs. Unless specified, the significance level was set at  $P < 0.05$ , and  
201 uncertainty ( $\pm$ ) always referred to a 95% confidence level. All statistical analyses were conducted using  
202 SPSS 17.0 (SPSS Inc., Chicago, IL, USA).

203 Structural equation modeling (SEM) was used to evaluate the pathways through which GP and GI  
204 affect Rs both directly and indirectly via biotic and abiotic factors. This was carried out according to  
205 the priori conceptual model to include all possible pathways (Supplementary Fig. 1), including (1)  
206 direct and indirect pathways of GP and GI influence on aboveground biomass, belowground biomass,  
207 soil temperature, and soil moisture; (2) direct and indirect pathways of GP and GI influence on soil  
208 microbial carbon and nitrogen; and (3) direct and indirect pathways of GP or GI influence on Rs via

209 biotic or abiotic factors. Before constructing the SEM models, a correlation matrix was derived for all  
210 variables using least-squares. To differentiate the effects of grazing management on Rs, grazing  
211 management was divided into two sections. The first SEM was based on bivariate regressions to focus  
212 on the direct and indirect effects of GI on Rs, and included aboveground biomass, belowground  
213 biomass, soil moisture, soil temperature, SMBC, and SMBN. The second SEM focused on both direct  
214 and indirect effects of GP on Rs. After first considering a full model that included all possible pathways,  
215 non-significant pathways were sequentially eliminated, until arriving at the final model. The  $\chi^2$  test,  
216 Akaike information criteria, and root mean square error of approximation were used to evaluate the fit  
217 of model. The SEM analyses were conducted using AMOS 17.0 (SPSS Inc., Chicago, IL, USA).

218

### 219 **3. Results**

#### 220 **3.1 Diurnal and seasonal dynamics of Rs rate under four different GIs and two GPs**

221 Daily maximum, minimum, and total Rs rates under the four GIs in the two grazing seasons are shown  
222 in Supplementary Tables 1 and 2, respectively. GI significantly influenced the diurnal variation of Rs in  
223 the WG (Table 1,  $P < 0.001$ ) and CG plots (Table 1,  $P < 0.001$ ). In a WG plot, the diurnal Rs  
224 significantly decreased as the stocking rate increased (Table 1,  $P < 0.001$ ), but in a CG plot, the diurnal  
225 Rs was significantly higher at the GIs of 2.7 and 5.3 sheep ha<sup>-1</sup> than at 0 and 8.7 sheep ha<sup>-1</sup> (Table 1,  $P$   
226  $< 0.001$ ). The diurnal Rs was not significantly different between the WG and CG plots in the  
227 non-grazing period (Table 1, 0 sheep ha<sup>-1</sup>,  $P = 0.964$ ); however, the Rs of a WG plot was significantly  
228 lower than that for a CG plot in the grazing period (Table 1, 2.7, 5.3, and 8.7 sheep ha<sup>-1</sup>,  $P < 0.001$ ),  
229 indicating that CG increases diurnal soil Rs.

230 From 2010 to 2011, Rs showed obvious seasonal and interannual changes in both WG and CG plots  
231 (Fig. 3, Table 2). Compared with the non-grazed plots (0 sheep ha<sup>-1</sup>), GI significantly increased the Rs  
232 between sampling seasons by approximately 22% in 2010 (Table 2,  $P = 0.007$ ), but decreased it by  
233 approximately 16% in 2011 (Table 2,  $P = 0.011$ ). The interactions between the GIs and sampling  
234 seasons showed no effect on Rs in 2010 and 2011. The GIs (Table 2,  $P = 0.826$ ) and the interactions  
235 between the GIs and years (Table 2,  $P = 0.070$ ) had no significant effect on Rs over the whole  
236 experiment period. A significant difference in Rs was observed between the WG and CG plots in 2010  
237 (Fig. 3, Table 2,  $P < 0.001$ ), but not in 2011 (Table 2,  $P < 0.964$ ). In both years, GP and year, as well as  
238 their interactions, had a significant effect on Rs ( $P < 0.001$ ), and Rs was approximately 22% higher in



239 the CG plots than in the WG plots ( $P < 0.001$ ) and was significantly and positively correlated with  
240 monthly precipitation (Table 3,  $P < 0.001$ ).

241

### 242 3.2 SMBC and SMBN

243 SMBC and SMBN at 5 and 10 cm soil depths were characterized by pronounced temporal dynamics  
244 between and within sampling seasons over the investigated time across 2010 and 2011 (Figs 4 and 5).  
245 Compared with WG, CG significantly increased SMBC by 6% in 2010 (Table 2,  $P < 0.001$ ), but  
246 decreased it by 19% in 2011 (Table 2,  $P < 0.001$ ). GI affected SMBC neither in 2010 (Table 2,  $P =$   
247 0.129), nor in 2011 (Table 2,  $P = 0.208$ ). SMBC was significantly affected by the interactions between  
248 GPs and GIs in 2011 (Table 2,  $P < 0.001$ ) and by the GPs and sampling seasons and their interactions in  
249 both 2010 (Table 2,  $P < 0.05$ ) and 2011 (Table 2,  $P < 0.05$ ). In both years, GP and GI alone did not  
250 significantly affect SMBC (Table 2,  $P > 0.05$ ), but their interactions had a significant effect on SMBC  
251 (Table 2,  $P < 0.001$ ). Moreover, SMBC was significantly affected by the interaction between the year  
252 and GP (Table 2,  $P < 0.001$ ), but not by the interaction between the year and GI (Table 2,  $P = 0.224$ ).  
253 When compared with 2010, the mean concentrations of SMBC decreased by 58% and 69% in the WG  
254 and CG plots, respectively, in 2011 (Fig. 4). SMBC was significantly negatively correlated with  
255 monthly precipitation (Table 3,  $P < 0.001$ ). SMBN was significantly affected by GP (Table 2,  $P < 0.05$ ),  
256 sampling season (Table 2,  $P < 0.001$ ), and the interactions between GI and GP (Table 2,  $P < 0.05$ ) in  
257 2010 and 2011. GI alone significantly affected SMBN (Table 2,  $P = 0.042$ ) in 2011, but not in 2010  
258 (Table 2,  $P = 0.601$ ). In both years, a significant difference in SMBN was observed between the WG  
259 and CG plots ( $P < 0.001$ ); the interaction between GP and GI had a significant effect on SMBN (Table 2,  
260  $P = 0.007$ ). Relative to WG, CG significantly decreased the mean concentration of SMBN by 11% over  
261 the entire study period (Table 3,  $P < 0.001$ ). SMBN was significantly positively correlated with monthly  
262 precipitation (Table 3,  $P < 0.001$ ).

263

### 264 3.3 Effects of grazing management on soil temperature, soil moisture, aboveground biomass, and 265 belowground biomass.

266 The diurnal variation in soil temperature, measured at 2-h intervals at depths of 0–10 cm, changed  
267 significantly over time (Fig. S1,  $P < 0.05$ ). No significant differences in soil temperature were observed

268 in both CG and WG plots under different stocking rates (2.7, 5.3, and 8.7 sheep ha<sup>-1</sup>) ( $P = 0.63$ ). Soil  
269 temperature in the CG plots was 3.1 °C higher ( $P = 0.02$ ) than that in the WG plots (Fig. S2). The soil  
270 temperature varied significantly ( $P < 0.001$ ) by year, with the highest values observed in 2011 and the  
271 lowest in 2010 (Fig. S2). The annual mean soil moisture in 2011 was 7.9% higher ( $P < 0.001$ ) than that  
272 in 2010 (Fig. S3). GI did not affect soil moisture ( $P = 0.87$ ); however, the CG plots increased soil  
273 moisture by 13.2% compared with that in the WG plots ( $P = 0.005$ ). A significant positive correlation  
274 was observed between monthly precipitation and soil temperature and soil moisture (Table 3,  $P < 0.001$ ).  
275 The GI significantly decreased the aboveground (Fig. S4,  $P < 0.001$ ) and belowground biomass (Fig. S4,  
276  $P = 0.001$ ). GP significantly affected the aboveground biomass ( $P < 0.001$ ), but not the belowground  
277 biomass ( $P = 0.071$ ). The aboveground biomass was higher in the CG plots than in the WG plots (by  
278 16%).

279

### 280 **3.4 Effect of grazing management on temperature sensitivity of soil respiration ( $Q_{10}$ )**

281 During the whole experimental period, a significant exponential positive correlation between the rates  
282 of Rs change and soil temperature was observed in both WG plots and CG plots, indicating that Rs is  
283 strongly influenced by soil temperature ( $P < 0.001$ , Table 3). A significant difference in the  $Q_{10}$  values  
284 of Rs was observed among the GIs in both WG and CG plots ( $P < 0.001$ , Table 3). With regard to the  
285 GPs, the  $Q_{10}$  values of the WG plots were significantly higher than those of the CG plots (Table 3).

286

### 287 **3.5 Structural equation models**

288 The structural equation models showed that Rs was indirectly explained by GI, which explained 57%  
289 of the total variation in Rs in the grazing ecosystem (Figs 6 and 7). **GI decreased Rs via its negative**  
290 **effect on aboveground biomass, whereas it increased Rs via its positive effect on soil microbial**  
291 **biomass (Fig. 6). These negative and positive indirect effects of GI on Rs offset the direct effect of GI**  
292 **on Rs (Fig. 6). GP explained 57% of the total variation in Rs in the grazing ecosystem (Fig. 7). We not**  
293 **only observed a direct positive effect of GP on Rs, but also an indirect effect of GP on Rs via its**  
294 **positive effects on soil moisture, soil temperature, and aboveground biomass. In addition, the negative**  
295 **effect of GP on Rs via its negative effect on SMBC and SMBN weakened the positive influence of GP**  
296 **on Rs.**

297

## 298 4. Discussion

### 299 4.1 Effect of grazing management on Rs

300 The diurnal changes in Rs under different GPs (warm and cold season) with four GIs (0, 2.7, 5.3, and  
301 8.7 sheep ha<sup>-1</sup>) observed in our study were within the range of the daily Rs reported by several  
302 previous studies (Zhang et al. 2014; Wang et al. 2015; Rong et al. 2017). We found that GI significantly  
303 affected the diurnal changes of Rs in both WG ( $P < 0.001$ ) and CG plots ( $P < 0.001$ ), but the response  
304 was different. Since the diurnal changes in Rs followed a unimodal pattern through time, consistent  
305 with soil temperature, this could be due to the differences in sensitivity to temperature in grazing  
306 seasons or could be due to the spatial heterogeneity of Rs (Wang et al. 2013; Wang et al. 2017). Our  
307 study revealed that CG enhances the diurnal Rs rate. These results are consistent with those of a  
308 previous study that performed a meta-analysis of Tibetan grasslands (Wang et al. 2017). The GI had a  
309 significant effect on seasonal changes in Rs in both 2010 ( $P = 0.007$ ) and 2011 ( $P = 0.011$ ); however,  
310 the interaction between season and GI had no significant effect on Rs in 2010 ( $P = 0.253$ ) and 2011 ( $P$   
311  $= 0.153$ ). It was also found that both GI ( $P = 0.826$ ) and the interaction between GI and year ( $P = 0.070$ )  
312 had no effect on Rs throughout the whole experimental period; this could be explained by both biotic  
313 and abiotic pathways (Fig. 6) in the following two ways: 1) The negative impact of GI on Rs was  
314 achieved indirectly by directly negatively affecting the aboveground biomass or by indirectly  
315 negatively affecting the microbial biomass; 2) At the same time, GI had a positive and indirect effect on  
316 Rs, which was achieved by directly negatively affecting the belowground biomass or by directly  
317 affecting soil moisture. Consequently, these two different types of pathways offset each other within a  
318 certain range.

319

320 The results of this study indicate that GP ( $P < 0.001$ ), year ( $P < 0.001$ ), and their interaction ( $P < 0.001$ )  
321 have strong effects on Rs. Compared to WG, CG promoted soil respiration by 22%. These results were  
322 supported by the SEM analyses performed in this and previous studies (Jiang et al. 2010; Wang et al.  
323 2013; Chen et al. 2015; Xu et al. 2016). The response of Rs to GP can be explained by the following  
324 three mechanisms (Fig. 7): (1) The CG increased soil temperature by 3.1 °C and increased soil moisture  
325 by 13.2%, and both soil temperature and soil moisture had direct positive effects on Rs. Soil  
326 temperature and water availability effect Rs by altering the activity of plant roots and soil microbes,  
327 and they also indirectly affect soil respiration by altering plant growth and substrate supply (Wan et al.

328 2007). In addition, the effect of soil temperature on Rs can be explained by the distribution of seasonal  
329 precipitation and interannual precipitation (Ru et al. 2017). This study found a significant correlation  
330 between monthly precipitation and Rs ( $P < 0.001$ ); the precipitation of the semi-arid grassland peaked in  
331 September 2011, strongly influencing soil respiration. The significant interannual variations in Rs  
332 might be mainly caused by seasonal precipitation fluctuations; this could be proved by setting up a  
333 controlled field experiment. (2) Compared with WG, CG significantly increased the aboveground  
334 biomass ( $P < 0.001$ ), which directly affected Rs. This might be due to the increased sensitivity of the  
335 aboveground biomass to low temperatures (Abdalla et al. 2010). On one hand, CG reduces litter and  
336 increases sunshine exposure, which is beneficial for plant growth in the subsequent year (Coughenour  
337 1991; Altesor et al. 2005; Wang et al. 2017). On the other hand, grazing leads to a warm and dry  
338 microclimate by removing aboveground plants and compacting the soil (Rong et al. 2017). (3) GP has a  
339 negative effect on Rs through its negative effects on soil microbial biomass and microbial nitrogen.  
340 Since Rs is a process of converting organic carbon to inorganic carbon, the rate of Rs is ultimately  
341 controlled by the supply of carbon substrates (Xu et al. 2016; Bagchi et al. 2017). Soil microbial  
342 communities exhibit high substrate utilization rates at low temperatures (Monson et al. 2006); thus, a  
343 decrease in microbial biomass will reduce soil carbon emissions (Allison et al. 2010). Previous studies  
344 have reported that SMBC primarily determines microbial respiration (Zhang et al. 2014). Significant  
345 changes in SMBC and SMBN have significant effects on  $\text{CO}_2$  emissions under different land-use  
346 patterns (Iqbal et al. 2010).

347 Previous studies have been conducted on the temperature sensitivity of Rs ( $Q_{10}$ ), both globally and in  
348 different ecosystems of China (Luo et al. 2001; Curiel et al. 2004; Davidson et al. 2006; Chen et al.  
349 2015; Chen et al. 2016). In our study, under different grazing rates, the  $Q_{10}$  values ranged between 1.31  
350 and 1.57 for the WG plots and between 1.21 and 1.36 for the CG plots, agreeing with the results of  
351 Chen et al. (2015). The  $Q_{10}$  values of the WG plots were higher than those of the CG plots. This might  
352 be due to soil water freezing at low temperatures, which inhibits soil microbial activity, and thus  
353 reduces  $Q_{10}$  in the CG seasons (Mahecha et al. 2010; Chen et al. 2016). The  $Q_{10}$  values for different  
354 ecosystems on a global scale are different, but the median is 1.4 (Mahecha et al. 2010). Our results are  
355 similar to this median, indicating that it is necessary to consider the impact of Rs on climate warming  
356 under different GIs and different grazing systems in order to accurately assess the carbon cycle of  
357 semi-arid grassland ecosystems. Overall, our results indicate that the mechanisms underlying the

358 effects of grazing management on Rs mainly depend on GP, but not on GI. This indicates that the  
359 effects of GP, especially seasonal and long-term grazing, should be considered in future manipulation  
360 experiments and carbon models to accurately simulate soil carbon dynamics in semi-arid grassland  
361 ecosystems.

362

#### 363 **4.2 Effects of grazing management on SMBC and SMBN**

364 The results of our study revealed that SMBC was higher at the beginning (May) and in the middle  
365 (September) of the growing season than in the dormant period (December) (Fig. 4). These results are  
366 consistent with the findings of previous studies conducted in the grassland ecosystems of the  
367 trans-Himalaya (Bagchi et al. 2017) and the Tibetan Plateau (Fu et al. 2012). We found that SMBN in  
368 the WG plots was significantly higher than that in the CG plots ( $P < 0.001$ ). The reason for this might  
369 be that the response of SMBN is more sensitive to grazing than that of SMBC (Fu et al. 2012). CG  
370 increased the soil temperature, which increased microbial biomass (Lu et al. 2013; Wang et al. 2017).

371 Our results show that GI did not have an effect on SMBC ( $P > 0.05$ ) and SMBN ( $P > 0.05$ ), but the  
372 interactions between GI and GP significantly affected SMBC ( $P < 0.001$ ) and SMBN ( $P < 0.007$ ). These  
373 results indicate that the response of SMBC is coupled with GI and GP. On one hand, high GI increases  
374 bulk density and urine input and decreases soil porosity and aggregation, affecting microorganism  
375 metabolism (Prieto et al. 2011; Liu et al. 2012,). On the other hand, GI leads to a variation in SMBC as  
376 a direct result of the soil water content from higher precipitation and temperature.

377 According to our SEM analysis, there are two pathways to explain the effects of GI (Fig. 6) and GP  
378 (Fig. 7) on SMBC and SMBN. (1) The effect of GI on SMBC and SMBN occurs mainly via its adverse  
379 effects on aboveground biomass, which directly stimulates SMBC. Recent studies have shown that the  
380 effects of grazing on soil microbial community size are largely dependent on GI via biotic factors  
381 (Zhao et al. 2017); grazing decreases the aboveground and belowground biomass (Koerner and Collins  
382 2014). Our results support the theory that grazing management could change soil microbial activities  
383 by regulating the aboveground and belowground biomass, which in turn changes the microbial biomass  
384 in the soil (Stark et al. 2015; Xu et al. 2017). (2) GP positively affects soil temperature and soil  
385 moisture, both of which stimulate SMBC and SMBN. In our study, compared with WG, CG  
386 significantly increased soil moisture ( $P = 0.005$ ) and soil temperature ( $P = 0.020$ ), which might  
387 stimulate more efficient enzymes to catalyze the reactions of soil organic matter decomposition (Stark

388 et al. 2015). Moreover, the dissolved organic carbon was metabolized only after rewetting, and the  
389 chemical signals released by the roots regulate the microbial communities, some of which have  
390 powerful feedbacks in carbon cycling (Schimel et al. 2013). Monthly precipitation events were  
391 significantly negatively related to SMBC ( $P < 0.001$ ), but significantly positively related to SMBN in  
392 our study ( $P < 0.001$ ). This agrees with the previous studies that found that the precipitation events  
393 stimulating microbial activity might shift the C-balance of grassland ecosystems (Curiel et al. 2007)  
394 and that grazing interacts with precipitation to affect the belowground biomass (Koerner and Collins  
395 2014). Overall, our results indicate that the effects of grazing management on SMBC and SMBN  
396 mainly depend on the interactions between GI and GP. This suggests that integrated grazing  
397 management strategies should be taken into account in future studies on nutrient turnover in the soils of  
398 semi-arid grassland ecosystems.

399

400 *Author contributions.* Fujiang Hou designed and directed the study, Zhen Wang carried out the  
401 data analysis, and wrote the manuscript. Xiuli Wan, Junbo Chen, Mei Tian, Xiayan Wang,  
402 Xianjiang Chen, Shenghua Chang collected samples, analyzed the data, and contributed to the  
403 final writing of the manuscript.

404

405 *Data availability.* from the corresponding author, Fujiang Hou ([cyhoufj@lzu.edu.cn](mailto:cyhoufj@lzu.edu.cn)), upon request.

406

407 *Competing interest.* The authors declare that they have no conflicts of interest.

408

409 *Acknowledgements.* We wish to thank for the help in the revision of the manuscript. This work was  
410 supported by the Program for Changjiang Scholars and Innovative Research Team in University  
411 (IRT17R50), the National Key Basic Research Program of China (2014CB138706), the National  
412 Natural Science Foundation of China (31172249), the Strategic Priority Research Program of Chinese  
413 Academy of Sciences (XDA2010010203), and the 111 project (B12002).

414

415

416

417

418 **References**

- 419 Abdalla, M., Jones, M., Yeluripati, J., Smith, P., Burke, J., and Williams, M.: Testing DayCent and  
420 DNDC model simulations of N<sub>2</sub>O fluxes and assessing the impacts of climate change on the  
421 gas flux and biomass production from a humid pasture, *Atmo. Environ.*, 44, 2961-2970,  
422 <https://doi.org/10.1016/j.atmosenv.2010.05.018>, 2010.
- 423 Allison, S. D., Wallenstein, M. D., and Bradford, M. A.: Soil-carbon response to warming dependent on  
424 microbial physiology, *Nat. Geosci.*, 3, 336, <https://doi.org/10.1038/ngeo846>.  
425 <https://www.nature.com/articles/ngeo846#supplementary-information>, 2010.
- 426 Altesor, A., Oesterheld, M., Leoni, E., Lezama, F., and Rodríguez, C.: Effect of grazing on community  
427 structure and productivity of a Uruguayan grassland, *Plant Ecol.*, 179, 83-91,  
428 <https://doi.org/10.1007/s11258-004-5800-5>, 2005.
- 429 Bagchi, S., Roy, S., Maitra, A., and Sran, R. S.: Herbivores suppress soil microbes to influence carbon  
430 sequestration in the grazing ecosystem of the Trans-Himalaya, *Agric. Ecosyst. Environ.*, 239,  
431 199-206, <https://doi.org/10.1016/j.agee.2017.01.033>, 2017.
- 432 Brookes, P. C., Landman, A., Pruden, G., and Jenkinson, D. S.: Chloroform fumigation and the release  
433 of soil nitrogen: A rapid direct extraction method to measure microbial biomass nitrogen in  
434 soil, *Soil Biol. Biochem.*, 17, 837-842, [https://doi.org/10.1016/0038-0717\(85\)90144-0](https://doi.org/10.1016/0038-0717(85)90144-0), 1985.
- 435 Cao, G. M., Tang, Y. H., Mo, W. H., Wang, Y. S., Li, Y. N., & Zhao, X. Q.: Grazing intensity alters  
436 soil respiration in an alpine meadow on the Tibetan plateau, *Soil Biol. Biochem.*, 36, 237-243,  
437 2004.
- 438 Chen, J. B., Hou, F. J., Chen, X. J., Wan, X. L., & Millner, J.: Stocking Rate and Grazing Season  
439 Modify Soil Respiration on the Loess Plateau, China, *Rangeland Ecol. Manage.*, 68, 48-53,  
440 <https://doi.org/10.1016/j.rama.2014.12.002>, 2015.
- 441 Chen, J., Zhou, X. H., Wang, J. F., Hruska, T., Shi, W. Y., Cao, J. J., Zhang, B. C., Xu, G. X., Chen, Y.  
442 Z. & Luo, Y. Q.: Grazing exclusion reduced soil respiration but increased its temperature  
443 sensitivity in a Meadow Grassland on the Tibetan Plateau, *Ecol. Evol.*, 6, 675-687,  
444 <http://dx.doi.org/10.1002/ece3.1867>, 2016.
- 445 Chen, X. J., Hou, F. J., Matthew, C. & He, X. Z.: Stocking rate effects on metabolizable energy intake  
446 and grazing behaviour of Tan sheep in steppe grassland on the Loess Plateau of Northwest  
447 China, *J. Agr. Sci.*, 148, 709-721, <https://doi.org/10.1017/S0021859610000511>, 2010.

448 Conant, R. T., Paustian, K., and Elliott, E. T.: Grassland management and conversion into grassland:  
449 effect on soil carbon, *Ecol. Appl.*, 11, 343-355,  
450 [https://doi.org/10.1890/1051-0761\(2001\)011\[0343:gmacig\]2.0.co;2](https://doi.org/10.1890/1051-0761(2001)011[0343:gmacig]2.0.co;2), 2001.

451 Coughenour, M. B.: Biomass and Nitrogen Responses to Grazing of Upland Steppe on Yellowstone's  
452 Northern Winter Range, *J. Appl. Ecol.*, 28, 71-82, <http://doi.org/10.2307/2404114>, 1991.

453 Cox, P. M., Betts, R. A., Jones, C. D., Spall, S. A., and Totterdell, I. J.: Acceleration of global warming  
454 due to carbon-cycle feedbacks in a coupled climate model, *Nature.*, 408, 184-187,  
455 <http://doi.org/10.1038/35041539>, 2000.

456 Cui, S., Zhu, X., Wang, S., Zhang, Z., Xu, B., Luo, C., Zhao, L., and Zhao, X.: Effects of seasonal  
457 grazing on soil respiration in alpine meadow on the Tibetan plateau, *Soil Use and*  
458 *Management.*, 30, 435-443, <https://doi.org/10.1111/sum.12125>, 2014.

459 Curiel yuste, J., Janssens, I. A., Carrara, A., and Ceulemans, R.: Annual Q10 of soil respiration reflects  
460 plant phenological patterns as well as temperature sensitivity, *Global Change Biol.*, 10,  
461 161-169, <https://doi.org/10.1111/j.1529-8817.2003.00727.x>, 2004.

462 Curiel yuste, J., Baldocchi, D. D., Gershenson, A., Goldenstein, A., Misson, L., and Wong, S.:  
463 Microbial soil respiration and its dependency on carbon inputs, soil temperature and moisture,  
464 *Global. Change. Biol.*, 13, <https://doi.org/2018-2035>, 10.1111/j.1365-2486.2007.01415.x,  
465 2007.

466 Davidson, E. A., and Janssens, I. A.: Temperature sensitivity of soil carbon decomposition and  
467 feedbacks to climate change, *Nature.* 440, 165, <http://dx.doi.org/10.1038/nature04514>, 2006.

468 de Faccio Carvalho, P. C., Anghinoni, I., de Moraes, A., de Souza, E. D., Sulc, R. M., Lang, C. R.,  
469 Flores, J. P. C., Terra Lopes, M. L., da Silva, J. L. S., Conte, O., de Lima Wesp, C., Levien, R.,  
470 Fontaneli, R. S., and Bayer, C.: Managing grazing animals to achieve nutrient cycling and soil  
471 improvement in no-till integrated systems, *Nutr. Cyc. Agroecosys.*, 88, 259-273,  
472 <https://doi.org/10.1007/s10705-010-9360-x>, 2010.

473 Deng, L., Shanguan, Z. P., Wu, G. L., & Chang, X. F.: Effects of grazing exclusion on carbon  
474 sequestration in China's grassland, *Earth-Sci. Rev.*, 173, 84-95,  
475 <https://doi.org/10.1016/j.earscirev.2017.08.008>, 2017.

476 Fu, B. J., Chen, L. D., Ma, K. M., Zhou, H. F., & Wang, J.: The relationships between land use and soil  
477 conditions in the hilly area of the loess plateau in northern Shaanxi, China, *Catena.* 39, 69-78,



478 [https://doi.org/10.1016/S0341-8162\(99\)00084-3](https://doi.org/10.1016/S0341-8162(99)00084-3), 2000.

479 Fu, G., Shen, Z. X., Zhang, X. Z., Zhou, Y. T., & Zhang, Y. J.: Response of microbial biomass to  
480 grazing in an alpine meadow along an elevation gradient on the Tibetan Plateau, *Eur. J. Soil*  
481 *Biol.*, 52, 27-29, <https://doi.org/10.1016/j.ejsobi.2012.05.004>, 2012.

482 Gallardo, A., and Schlesinger, W. H.: Carbon and nitrogen limitations of soil microbial biomass in  
483 desert ecosystems, *Biogeochemistry.*, 18, 1-17, <https://doi.org/10.1007/BF00000423>, 1992.

484 Hawkes, C. V., Waring, B. G., Rocca, J. D., and Kivlin, S. N.: Historical climate controls soil  
485 respiration responses to current soil moisture, *Proc. Natl. Acad. Sci. U. S. A.*, 114, 6322-6327,  
486 <https://doi.org/10.1073/pnas.1620811114>, 2017.

487 Hou, F. J., Xiao, J. Y., Nan, Z. B.: Eco-restoration of abandoned farmland in the Loess Plateau.  
488 *Chinese Journal of Applied Ecology.*, 13 (8), 923–929, 2002. (in Chinese with English  
489 abstract)

490 Hu, S., Chapin, F. S., Firestone, M., Field, C., and Chiariello, N.: Nitrogen limitation of microbial  
491 decomposition in a grassland under elevated CO<sub>2</sub>, *Nature.*, 409, 188-191,  
492 <http://doi.org/10.1038/35051576>, 2001.

493 **Ingram, L. J., Stahl, P. D., Schuman, G. E., Buyer, J. S., Vance, G. F., Ganjegunte, G. K., Welker, J. M.,**  
494 **and Derner, J. D.: Grazing Impacts on Soil Carbon and Microbial Communities in a**  
495 **Mixed-Grass Ecosystem, *Soil Sci. Soc. Am. Journal.*, 72, 939-948,**  
496 **<https://doi.org/10.2136/sssaj2007.0038>, 2008.**

497 **Iqbal, J., Hu, R., Feng, M., Lin, S., Malghani, S., and Ali, I. M.: Microbial biomass, and dissolved**  
498 **organic carbon and nitrogen strongly affect soil respiration in different land uses: A case study**  
499 **at Three Gorges Reservoir Area, South China, *Agri., Ecosyst. & Environ.*, 137, 294-307,**  
500 **<https://doi.org/10.1016/j.agee.2010.02.015>, 2010.**

501 Jia, B. R., Zhou, G. Z., Wang, F. Y., Wang, Y. H., & Weng, E.: Effects Of Grazing On Soil Respiration  
502 Of *Leymus Chinensis* Steppe, *Clim. Change.*, 82, 211-223,  
503 <https://doi.org/10.1007/s10584-006-9136-0>, 2007.

504 Jiang, C. M., Yu, G. R., Fang, H. J., Cao, G. M., & Li Y. N.: Short-term effect of increasing nitrogen  
505 deposition on CO<sub>2</sub>, CH<sub>4</sub> and N<sub>2</sub>O fluxes in an alpine meadow on the Qinghai-Tibetan Plateau,  
506 China. *Atmos. Environ.*, 44, 2920-2926, <https://doi.org/10.1016/j.atmosenv.2010.03.030>,  
507 2010.

508 Koerner, S. E., and Collins, S. L.: Interactive effects of grazing, drought, and fire on grassland plant  
509 communities in North America and South Africa, *Ecology*, 95, 98-109, 10.1890/13-0526.1,  
510 2014.Lange, M., Eisenhauer, N., Sierra, C. A., Bessler, H., Engels, C., Griffiths, R. I.,  
511 Mellado-Vázquez, P. G., Malik, A. A., Roy, J., Scheu, S., Steinbeiss, S., Thomson, B. C.,  
512 Trumbore, S. E., and Gleixner, G.: Plant diversity increases soil microbial activity and soil  
513 carbon storage, *Nat. Commun.*, 6, 6707, <http://dx.doi.org/10.1038/ncomms7707>, 2015.

514 Liu, N., Zhang, Y., Chang, S., Kan, H., and Lin, L.: Impact of Grazing on Soil Carbon and Microbial  
515 Biomass in Typical Steppe and Desert Steppe of Inner Mongolia, *PLOS ONE*, 7, e36434,  
516 [10.1371/journal.pone.0036434](https://doi.org/10.1371/journal.pone.0036434), 2012.

517 Lu, M., Zhou, X. H., Yang, Q., Li, H., Luo, Y. Q., Fang, C. M., Chen, J. K., Yang, X. & Li, B.:  
518 Responses of ecosystem carbon cycle to experimental warming: a meta-analysis, *Ecology*, 94,  
519 726-738, <https://doi.org/10.1890/12-0279.1>, 2013.

520 Luo, Y. Q., Wan, S. Q., Hui, D. F., & Wallace, L. L.: Acclimatization of soil respiration to warming in  
521 a tall grass prairie, *Nature*, 413, 622-625, <https://doi.org/10.1038/35098065>, 2001.

522 Mahecha, M. D., Reichstein, M., Carvalhais, N., Lasslop, G., Lange, H., Seneviratne, S. I., Vargas, R.,  
523 Ammann, C., Arain, M. A., Cescatti, A., Janssens, I. A., Migliavacca, M., Montagnani, L., and  
524 Richardson, A. D.: Global Convergence in the Temperature Sensitivity of Respiration at  
525 Ecosystem Level, *Science*, 329, 838-840, <http://doi.org/10.1126/science.1189587>, 2010.

526 Mcsherry, M. E., and Ritchie, M. E.: Effects of grazing on grassland soil carbon: a global review,  
527 *Global Change Biol.*, 19, 1347-1357, <https://doi.org/10.1111/gcb.12144>, 2013.

528 Monson, R. K., Lipson, D. L., Burns, S. P., Turnipseed, A. A., Delany, A. C., Williams, M. W., and  
529 Schmidt, S. K.: Winter forest soil respiration controlled by climate and microbial community  
530 composition, *Nature*, 439, 711-714, <http://doi.org/10.1038/nature04555>, 2006.

531 Morgan, J. A., Milchunas, D. G., Lecaen, D. R., West, M., and Mosier, A. R.: Carbon dioxide  
532 enrichment alters plant community structure and accelerates shrub growth in the shortgrass  
533 steppe, *Proc. Natl. Acad. Sci. U. S. A.*, 104, 14724-14729,  
534 <https://doi.org/10.1073/pnas.0703427104>, 2007.

535 Ni, J.: Carbon storage in grasslands of China, *J. Arid Environ.*, 50, 205-218,  
536 <https://doi.org/10.1006/jare.2001.0902>, 2002.

537 Prieto, L. H., Bertiller, M. B., Carrera, A. L., and Olivera, N. L.: Soil enzyme and microbial activities

538 in a grazing ecosystem of Patagonian Monte, Argentina, *Geoderma*, 162, 281-287,  
539 <https://doi.org/10.1016/j.geoderma.2011.02.011>, 2011.

540 Raich, J. W., and Schlesinger, W. H.: The global carbon dioxide flux in soil respiration and its  
541 relationship to vegetation and climate, *Tellus B.*, 44, 81-99.  
542 <https://doi.org/10.1034/j.1600-0889.1992.t01-1-00001.x>, 1992.

543 Rong, Y. P., Johnson, D. A., Wang, Z. M. & Zhu, L. L.: Grazing effects on ecosystem CO<sub>2</sub> fluxes  
544 regulated by interannual climate fluctuation in a temperate grassland steppe in northern China,  
545 *Agric. Ecosyst. Environ.*, 237, 194-202, <https://doi.org/10.1016/j.agee.2016.12.036>, 2017.

546 Ru, J. Y., Zhou, Y. Q., Hui, D. F., Zheng, M. M., & Wan, S. Q.: Shifts of growing-season precipitation  
547 peaks decrease soil respiration in a semiarid grassland, *Global Change Biol.*, 1001-1011,  
548 <https://doi.org/10.1111/gcb.13941>, 2018.

549 Schimel, J., and Schaeffer, S.: Microbial control over carbon cycling in soil, *Front. Microbiol.*, 3, 348.  
550 <http://doi.org/10.3389/fmicb.2012.00348>, 2012.

551 Stark, S., Männistö, M. K., Ganzert, L., Tirola, M., and Häggblom, M. M.: Grazing intensity in  
552 subarctic tundra affects the temperature adaptation of soil microbial communities, *Soil Biol.*  
553 *Biochem.*, 84, 147-157, <https://doi.org/10.1016/j.soilbio.2015.02.023>, 2015.

554 Thakur, M. P., Milcu, A., Manning, P., Niklaus, P. A., Roscher, C., Power, S., Reich, P. B., Scheu, S.,  
555 Tilman, D., Ai, F., Guo, H., Ji, R., Pierce, S., Ramirez, N. G., Richter, A. N., Steinauer, K.,  
556 Strecker, T., Vogel, A., and Eisenhauer, N.: Plant diversity drives soil microbial biomass  
557 carbon in grasslands irrespective of global environmental change factors, *Global Change Biol.*,  
558 21, 4076-4085, <http://dx.doi.org/10.1111/gcb.13011>, 2015.

559 Thomey, M. L., Collins, S. L., Vargas, R., Johnson, J. E., Brown, R. F., Natvig, D. O., and Friggens, M.  
560 T.: Effect of precipitation variability on net primary production and soil respiration in a  
561 Chihuahuan Desert grassland, *Global Change Biol.*, 17, 1505-1515,  
562 <http://dx.doi.org/10.1111/j.1365-2486.2010.02363.x>, 2011.

563 Vance, E. D., Brookes, P. C., and Jenkinson, D. S.: An extraction method for measuring soil microbial  
564 biomass C, *Soil Biol. Biochem.*, 19, 703-707, [https://doi.org/10.1016/0038-0717\(87\)90052-6](https://doi.org/10.1016/0038-0717(87)90052-6),  
565 1987.

566 Wan, S. Q., Norby, R. J., Ledford, J., and Weltzin, J. F.: Responses of soil respiration to elevated CO<sub>2</sub>,  
567 air warming, and changing soil water availability in a model old-field grassland, *Global*

568 Change Biol.13, 2411-2424, <https://doi.org/10.1111/j.1365-2486.2010.02363.x>, 2007.

569 Wang, D., Liu, Y., Shang, Z. H., Tian, F. P., Wu, G. L., Chang, X. F., and Warrington, D.: Effects of  
570 Grassland Conversion From Cropland on Soil Respiration on the Semi-Arid Loess Plateau,  
571 China. CLEAN-SOIL AIR WATER., 43, 1052-1057, <https://doi.org/10.1002/clen.201300971>,  
572 2015.

573 Wang, H., Liu, H. Y., Wang, Y. H., Xu, W., Liu, A. R., Ma, Z. Y., Mi, Z. R., Zhang, Z. H., Wang, S. P.  
574 & He, J. S.: Warm- and cold- season grazing affect soil respiration differently in alpine  
575 grasslands, Agric. Ecosyst. Environ., 248, 136-143, <https://doi.org/10.1016/j.agee.2017.07.041>,  
576 2017.

577 Wang, K. H., McSorley, R., Bohlen, P., and Gathumbi, S. M: Cattle grazing increases microbial  
578 biomass and alters soil nematode communities in subtropical pastures, Soil Biol. Biochem., 38,  
579 1956-1965,. <https://doi.org/10.1016/j.soilbio.2005.12.019>, 2006.

580 Wang, S., Wilkes, A., Zhang, Z., Chang, X., Lang, R., Wang, Y., and Niu, H.: Management and land  
581 use change effects on soil carbon in northern China's grasslands: a synthesis, Agr. Ecosyst.  
582 Environ., 142, 329-340, <https://doi.org/10.1016/j.agee.2011.06.002>, 2011.

583 Wang, W. & Fang, J. Y.: Soil respiration and human effects on global grasslands, Global Planet.  
584 Change. 67, 20-28, <https://doi.org/10.1016/j.gloplacha.2008.12.011>, 2009.

585 Wang, Y. G., Zhu H., & Li, Y.: Spatial heterogeneity of soil moisture, microbial biomass carbon and  
586 soil respiration at stand scale of an arid scrubland, Environ. Earth Sci.70, 3217-3224,  
587 <https://doi.org/10.1007/s12665-013-2386-z>, 2013.

588 Wu, G. L., Wu, D., Liu, Y., Ding, L. M., and Liu, Z. H.: Warm-season Grazing Benefits Species  
589 Diversity Conservation and Topsoil Nutrient Sequestration in Alpine Meadow, Land Degrad.  
590 Dev. 28, 1311-1319, <https://doi.org/10.1002/ldr.2536>, 2017.

591 Xu, S., Silveira, M. L., Inglett, K. S., Sollenberger, L. E., and Gerber, S.: Soil microbial community  
592 responses to long-term land use intensification in subtropical grazing lands, Geoderma. 293,  
593 73-81, <https://doi.org/10.1016/j.geoderma.2017.01.019>, 2017.

594 Xu, W. F., Li, X. L., Wei, L., Li, L. H., Hou, L. Y., Shi, H. Q., Xia, J. Z., Dan, L., Zhang, H. C., &  
595 Yang, C.: Spatial patterns of soil and ecosystem respiration regulated by biological and  
596 environmental variables along a precipitation gradient in semi-arid grasslands in China., Ecol.  
597 Res. 31, 505-513, <https://doi.org/10.1007/s11284-016-1355-x>, 2016.

598 Zhang, C. P., Niu, D. C., Hall, S. J., Wen, H. Y., Li, X., Fu, H., Wan, C. G., and Elser, J. J.: Effects of  
599 simulated nitrogen deposition on soil respiration components and their temperature  
600 sensitivities in a semiarid grassland, *Soil Biol. Biochem.* 75, 113-123,  
601 <https://doi.org/10.1016/j.soilbio.2014.04.01>, 2014.

602 Zhao, F., Ren, C., Shelton, S., Wang, Z., Pang, G., Chen, J., and Wang, J.: Grazing intensity influence  
603 soil microbial communities and their implications for soil respiration, *Agric. Ecosyst. Environ.*,  
604 249, 50-56, <https://doi.org/10.1016/j.agee.2017.08.007>, 2017.

605 Zhou, G., Zhou, X., He, Y., Shao, J., Hu, Z., Liu, R., Zhou, H., and Hosseinibai, S.: Grazing intensity  
606 significantly affects belowground carbon and nitrogen cycling in grassland ecosystems: a  
607 meta-analysis, *Global Change Biology*, 23, 1167-1179, <https://doi.org/10.1111/gcb.13431>,  
608 2017.

609

610

611

612

613

614

615

616

617

618

619

620

621

622

623

624

625

626

627

628 **Table 1.** Effect of warm-season grazing (WG) and cold-season grazing (CG) on daily soil  
629 respiration (Rs) under different grazing intensities (GI). F- and P-values were obtained by the  
630 one-way ANOVA analyses. Different letters in the same column indicate statistical significant  
631 differences between grazing intensity under certain grazing season ( $P < 0.05$ ). Data are shown as  
632 the mean  $\pm$  SE (n=800).

| GI (sheep ha <sup>-1</sup> ) | Rs ( $\mu$ mol CO <sub>2</sub> m <sup>-2</sup> s <sup>-1</sup> ) |                  |      |         |              |
|------------------------------|------------------------------------------------------------------|------------------|------|---------|--------------|
|                              | WG                                                               | CG               | df   | F-Value | P-Value      |
| <b>0</b>                     | 0.91 $\pm$ 0.02a                                                 | 0.91 $\pm$ 0.02c | 1.00 | 0.002   | 0.964        |
| <b>2.7</b>                   | 0.81 $\pm$ 0.02b                                                 | 1.30 $\pm$ 0.02a | 1.00 | 307.444 | <b>0.001</b> |
| <b>5.3</b>                   | 0.76 $\pm$ 0.02c                                                 | 1.28 $\pm$ 0.02a | 1.00 | 380.222 | <b>0.001</b> |
| <b>8.7</b>                   | 0.76 $\pm$ 0.02c                                                 | 1.18 $\pm$ 0.02b | 1.00 | 288.455 | <b>0.001</b> |

633

634

635

636

637

638

639

640

641

642

643

644

645

646

647

648

649

650

651

652

653 **Table 2.** Effects of grazing regime (GP), grazing intensities (GI), year, sampling season , and their  
654 interactions on the rates of Rs, SMBC, and SMBN. F-and P-values are obtained by the  
655 **repeated-measures ANOVA analyses.** Values in bold indicate significance levels of  $P < 0.05$ .

| Year           | Factors      | Rs |         |                  | SMBC |          |                  | SMBN |         |                  |
|----------------|--------------|----|---------|------------------|------|----------|------------------|------|---------|------------------|
|                |              | df | F Value | P                | df   | F Value  | P                | df   | F Value | P                |
| <b>2010</b>    | GP           | 1  | 83.672  | <b>&lt;0.001</b> | 1    | 21.270   | <b>&lt;0.001</b> | 1    | 5.008   | <b>0.027</b>     |
|                | GI           | 3  | 4.234   | <b>0.007</b>     | 3    | 1.922    | 0.129            | 3    | 0.623   | 0.601            |
|                | GI×GP        | 3  | 9.427   | <b>&lt;0.001</b> | 3    | 44.321   | <b>&lt;0.001</b> | 3    | 5.976   | <b>&lt;0.001</b> |
|                | Season       | 2  | 218.389 | <b>&lt;0.001</b> | 2    | 68.065   | <b>&lt;0.001</b> | 2    | 25.685  | <b>&lt;0.001</b> |
|                | GP×Season    | 2  | 6.186   | <b>0.003</b>     | 2    | 15.389   | <b>&lt;0.001</b> | 2    | 5.976   | <b>&lt;0.001</b> |
|                | GI×Season    | 6  | 1.317   | 0.253            | 6    | 3.828    | <b>&lt;0.001</b> | 6    | 4.515   | <b>0.013</b>     |
|                | GI×GP×Season | 6  | 0.867   | 0.521            | 6    | 5.417    | <b>&lt;0.001</b> | 6    | 2.192   | <b>0.047</b>     |
| <b>2011</b>    | GP           | 1  | 0.002   | 0.964            | 1    | 28.930   | <b>&lt;0.001</b> | 1    | 12.725  | <b>&lt;0.001</b> |
|                | GI           | 3  | 3.853   | <b>0.011</b>     | 3    | 1.534    | 0.208            | 3    | 2.812   | <b>0.042</b>     |
|                | GI×GP        | 3  | 0.205   | 0.893            | 3    | 2.186    | 0.092            | 3    | 2.966   | <b>0.034</b>     |
|                | Season       | 2  | 333.087 | <b>&lt;0.001</b> | 2    | 29.162   | <b>&lt;0.001</b> | 2    | 81.204  | <b>&lt;0.001</b> |
|                | GP×Season    | 2  | 6.640   | <b>0.002</b>     | 2    | 3.353    | <b>0.038</b>     | 2    | 20.360  | <b>&lt;0.001</b> |
|                | GI×Season    | 6  | 1.593   | 0.153            | 6    | 3.682    | <b>0.002</b>     | 6    | 9.269   | <b>&lt;0.001</b> |
|                | GI×GP×Season | 6  | 1.498   | 0.183            | 6    | 2.955    | 0.009            | 1    | 0.000   | 0.526            |
| <b>Overall</b> | GP           | 1  | 12.391  | <b>&lt;0.001</b> | 1    | 0.197    | 0.658            | 1    | 18.129  | <b>&lt;0.001</b> |
|                | GI           | 3  | 0.299   | 0.826            | 3    | 2.470    | 0.062            | 3    | 1.873   | 0.134            |
|                | GI×GP        | 3  | 1.395   | 0.244            | 3    | 22.313   | <b>&lt;0.001</b> | 3    | 4.154   | <b>0.007</b>     |
|                | Year         | 1  | 36.942  | <b>&lt;0.001</b> | 1    | 1280.544 | <b>&lt;0.001</b> | 1    | 0.995   | 0.319            |
|                | GP×Year      | 1  | 16.867  | <b>&lt;0.001</b> | 1    | 16.170   | <b>&lt;0.001</b> | 1    | 3.473   | 0.063            |
|                | GI×Year      | 3  | 2.375   | 0.070            | 3    | 1.396    | 0.244            | 3    | 2.051   | 0.107            |
|                | GI×GP×Year   | 3  | 1.867   | 0.135            | 3    | 20.096   | <b>&lt;0.001</b> | 3    | 3.195   | <b>0.024</b>     |

656

657

658

659

660

661

662

663

664

665 **Table 3.** Pearson correlation between monthly precipitation (P) and soil temperature (ST),soil  
 666 moisture (SM) soil respiration (Rs), soil microbial biomass carbon (SMBC) and soil microbial  
 667 biomass nitrogen (SMBN). \*\*\* indicate significance level at  $P < 0.001$ .

| Variables | ST       | SM       | SR       | SMBC      | SMBN     |
|-----------|----------|----------|----------|-----------|----------|
| P         | 0.298*** | 0.737*** | 0.475*** | -0.162*** | 0.543*** |

668

669

670

671

672

673

674

675

676

677

678

679

680

681

682

683

684

685

686

687

688

689

690

691 **Table 4.** Temperature sensitivity of soil respiration ( $Q_{10}$ ) for the grazing regimes (warm-season  
 692 grazing, WG; cold-season grazing, CG) with different grazing intensities (GI, 0, 2.7, 5.3, 8.7 sheep



693 ha<sup>-1</sup>). a and b are two coefficients in the regression line  $R_s = ae^{bT}$ , where  $R_s$  is soil respiration and T is  
 694 soil temperature.  $r^2_{adj}$  is the adjustive determinant coefficient,  $Q_{10}$  is the temperature quotient ( $= e^{10b}$ ).  
 695 Significance levels of  $P < 0.05$  indicated in bold.

| <b>GP</b>                      | <b>GI</b> | <b>a</b> | <b>b</b> | <b><math>r^2_{adj}</math></b> | <b>P</b>         | <b><math>Q_{10}</math></b> |
|--------------------------------|-----------|----------|----------|-------------------------------|------------------|----------------------------|
| <b>(sheep ha<sup>-1</sup>)</b> |           |          |          |                               |                  |                            |
| WG                             | 0         | 0.510    | 0.027    | 0.212                         | <b>&lt;0.001</b> | 1.310                      |
|                                | 2.7       | 0.318    | 0.045    | 0.478                         | <b>&lt;0.001</b> | 1.568                      |
|                                | 5.3       | 0.313    | 0.043    | 0.458                         | <b>&lt;0.001</b> | 1.537                      |
|                                | 8.7       | 0.343    | 0.039    | 0.373                         | <b>&lt;0.001</b> | 1.477                      |
| CG                             | 0         | 0.473    | 0.031    | 0.271                         | <b>&lt;0.001</b> | 1.363                      |
|                                | 2.7       | 0.689    | 0.019    | 0.155                         | <b>&lt;0.001</b> | 1.209                      |
|                                | 5.3       | 0.643    | 0.022    | 0.200                         | <b>&lt;0.001</b> | 1.246                      |
|                                | 8.7       | 0.598    | 0.023    | 0.196                         | <b>&lt;0.001</b> | 1.259                      |

696

697

698

699

700

701

702

703

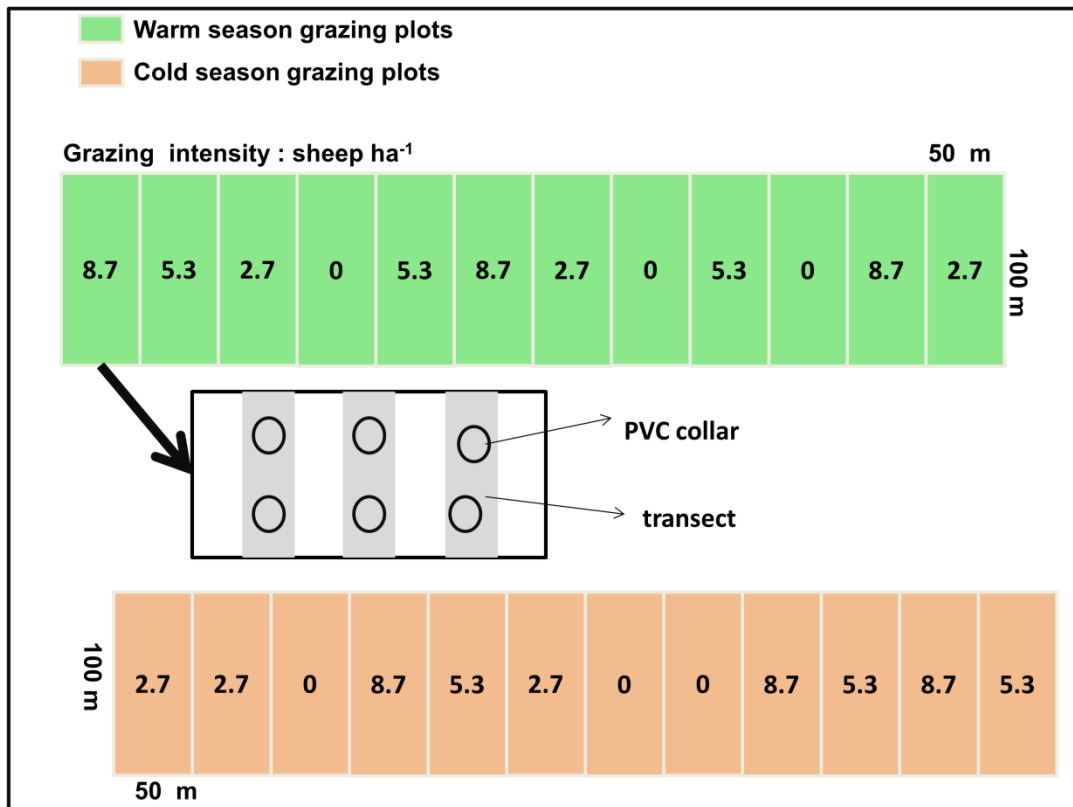

704

705 **Figure 1.** Long-term rotational grazing experimental design at the study site. Green box represent warm  
 706 season grazing plots; brown boxes represent cold season grazing plots..

707

708

709

710

711

712

713

714

715

716

717

718

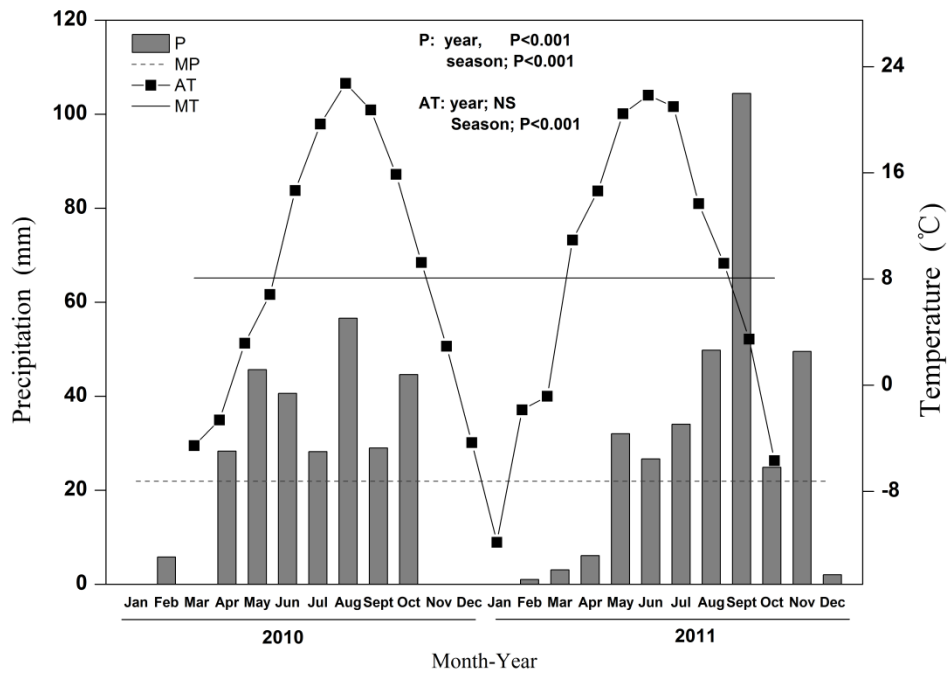

719

720 **Figure. 2.** Temporal variation in measured values of air temperature, precipitation, at the study site  
 721 from January 2010 to December 2011. Straight line and line of dashes represents mean annual  
 722 precipitation represents and mean annual air temperature from 2001 to 2009. The vegetation of the  
 723 grassland starts to regreen in late April to early May, and starts to wither in late October. Air  
 724 temperature and precipitation did not change significantly during 2010 and 2011.

725

726

727

728

729

730

731

732

733

734

735

736

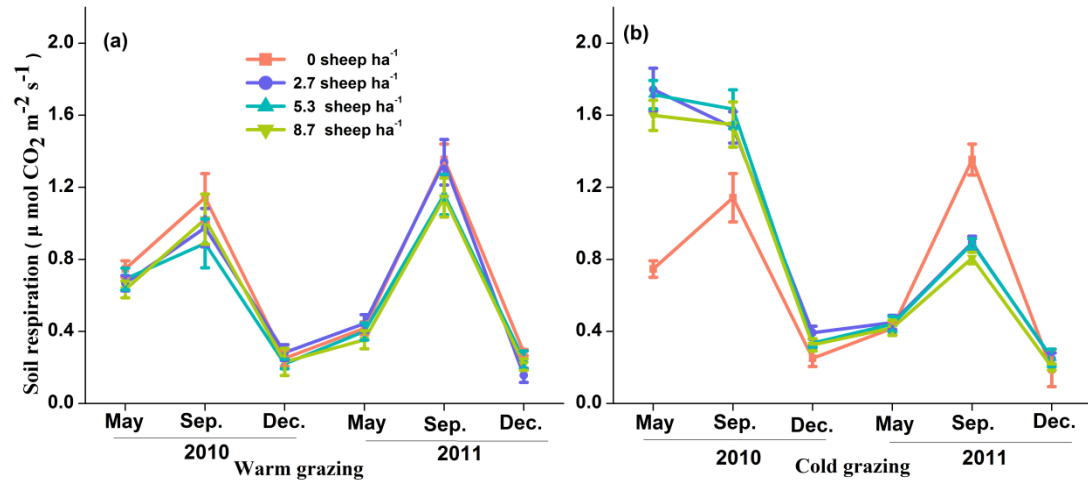

737

738 **Figure 3.** Seasonal dynamics of Rs with different grazing intensities (a) in warm season grazing area,

739 (b) in cold season grazing area. Vertical bars indicate mean bars standard errors (n=9).

740

741

742

743

744

745

746

747

748

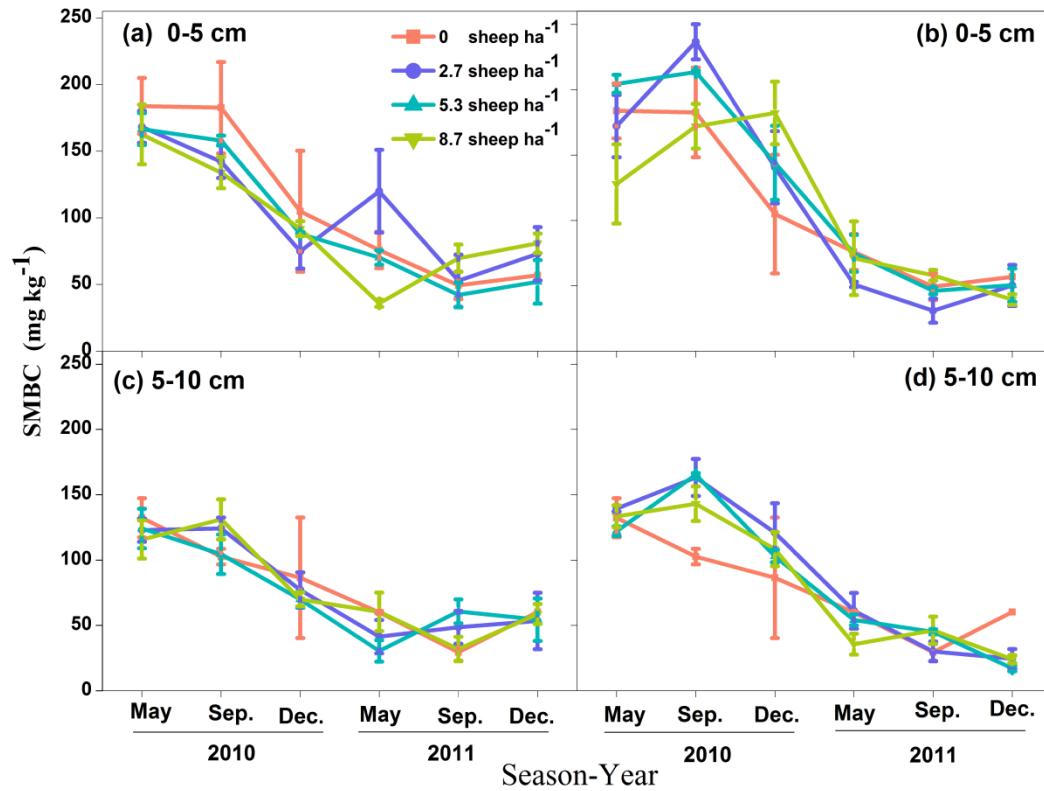

749

750 **Figure 4.** Seasonal dynamics of Soil microbial biomass carbon (SMBC) (a) 0-5 cm soil layers in  
 751 warm-season grazing plots; (b) 0-5 cm in cold-season grazing plots; (c) 5-10 cm in warm-season  
 752 grazing plots; (d) 5-10 cm in cold-season grazing plots. Vertical bars represent the standard error of the  
 753 measurement mean (n=3) for each observation date.

754

755

756

757

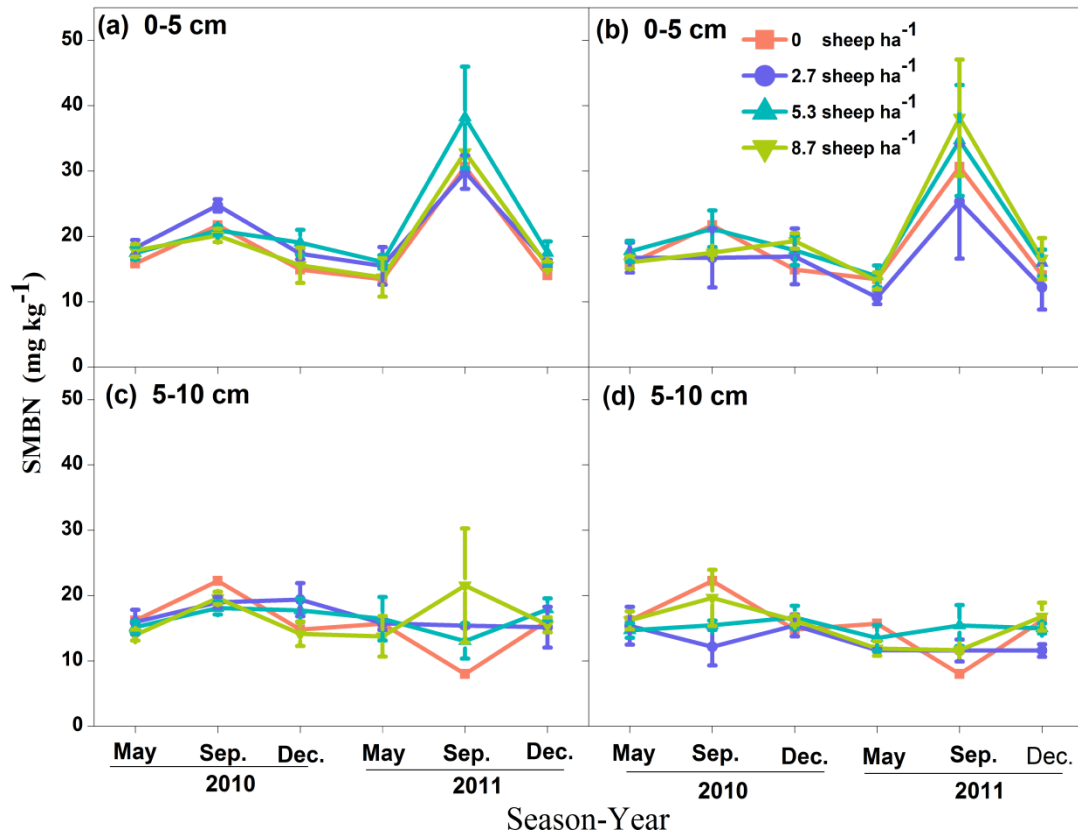

758

759 **Figure 5.** Seasonal dynamics of soil microbial biomass nitrogen (SMBN) (a) 0-5 cm in warm-season  
 760 grazing plots; (b) 0-5 cm in cold-season grazing plots; (c) 5-10 cm in warm-season grazing plots; (d)  
 761 5-10 cm in cold-season grazing plots. Vertical bars represent the standard error of the measurement  
 762 mean (n =3) for each observation date.

763

764

765

766

767

768

769

770

771

772

773

774

775

776

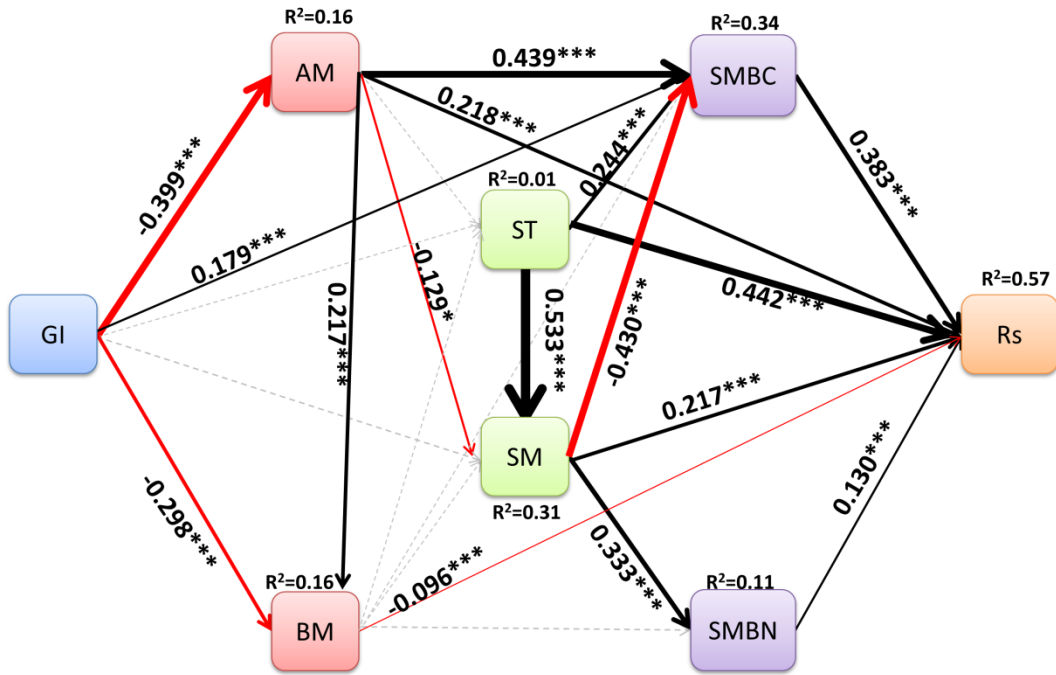

777

778 **Figure 6.** Structural equation model of grazing intensities (Mahecha et al.) effects on soil respiration

779 (Rs) via direct or indirect effect on aboveground biomass (AM), belowground biomass(BM), soil

780 temperature (ST), SM (soil moisture), SMBC (soil microbial carbon), soil microbial nitrogen (SMBN).

781 Red and black arrows represent significant negative and positive pathways, respectively. Bold numbers

782 indicate the standard path coefficients. Arrow width is proportional to the strength of the relationship.

783 R<sup>2</sup> represent the proportion of variance explained for each dependent variable in the model.

784 \*\*\*P<0.001, \*\*P<0.01, \*<0.05;  $\chi=10.746$ ; P=0.057; root mean square error of approximation

785 (RMSEA) =0.059; P =0.057; Akaike information criteria (AIC) =88.746.

786

787

788

789

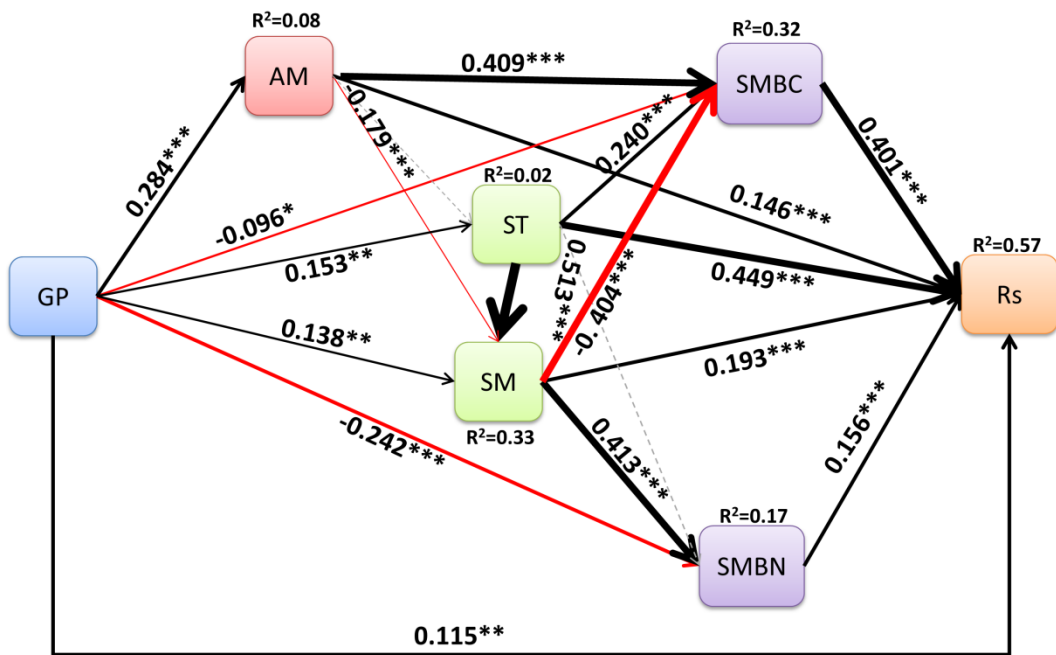

790

791 **Figure 7.** Structural equation model of grazing regime (GP) effects on soil respiration (Rs) via direct  
 792 or indirect effect on aboveground biomass (AM), soil temperature (ST), SM (soil moisture), SMBC  
 793 (soil microbial carbon), soil microbial nitrogen (SMBN). The structural equation model considered all  
 794 plausible pathways through which experimental treatments influence Rs. Red and black arrows  
 795 represent significant negative and positive pathways, respectively. Bold numbers indicate the standard  
 796 path coefficients. Arrow width is proportional to the strength of the relationship.  $R^2$  represent the  
 797 proportion of variance explained for each dependent variable in the model.  $^{***}P<0.001$ ,  $^{**}P<0.01$ ,  
 798  $^*P<0.05$ ;  $\chi=2.418$ ;  $P=0.299$ ; root mean square error of approximation (RMSEA) =0.025;  $P=0.299$ ;  
 799 Akaike information criteria (AIC) =68.418.

800

801

802
